# Supplementary material for: Vitrification with Dimethyl Sulfoxide Induces Transcriptomic Alteration of Gene and Transposable Element Expression in Immature Human Oocytes
Source: MDPI journal article supplement (doi:10.3390/genes14061232), 2023-06-08
Supplement: s1 [file s1]

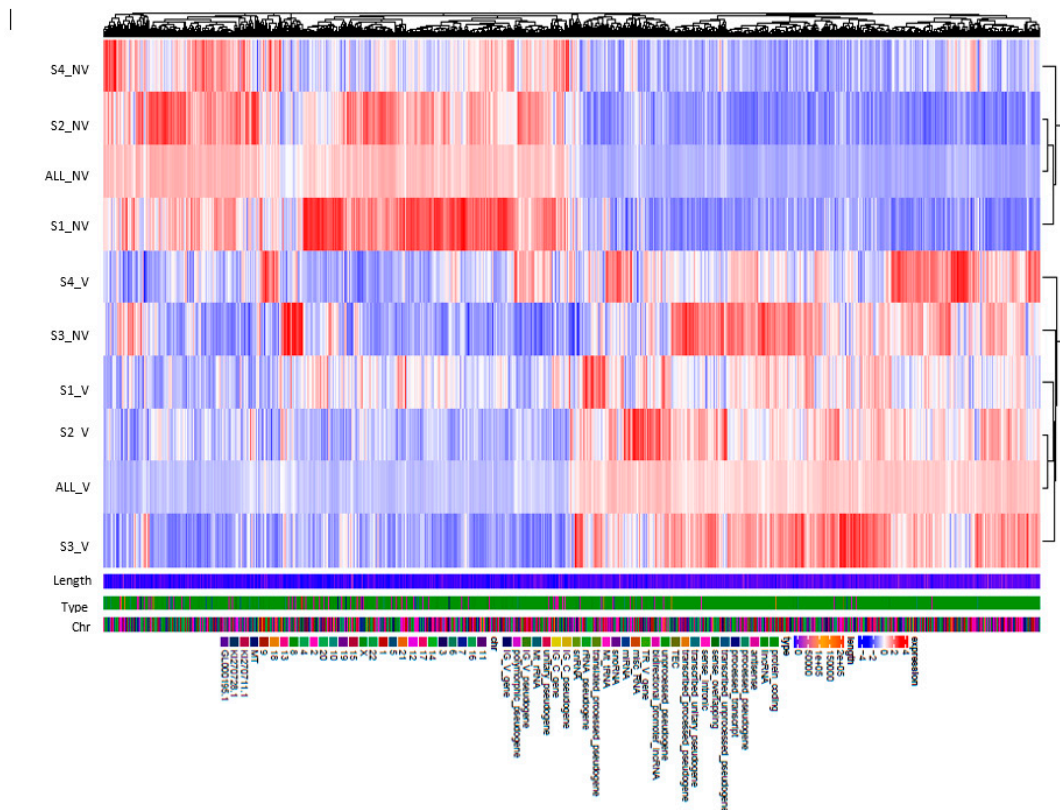

Figure S1: Hierarchical clustering map representing differential gene expression in all samples, analyzed by group and subject. S#: subject #, V = Vitrified cohort; NV = Non-Vitrified cohort. Red to blue gradient color scheme correlates with higher and lower gene expression, respectively.

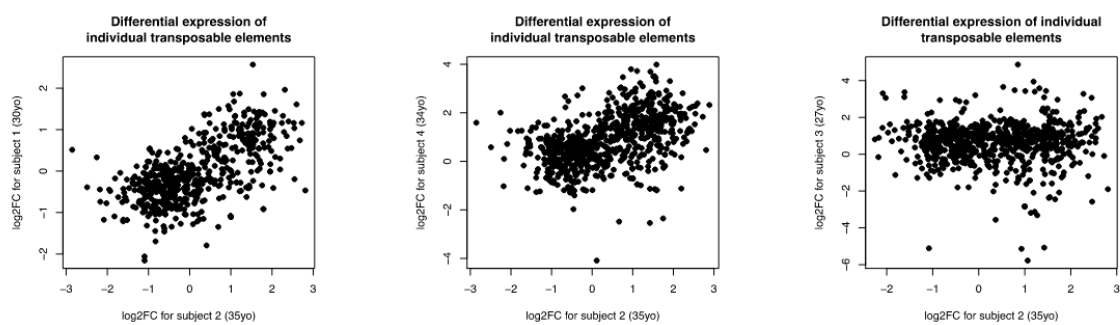

Figure S2: Transposable element expression correlation between Subject 2 and 1; Subject 2 and 4; Subject 2 and 3.

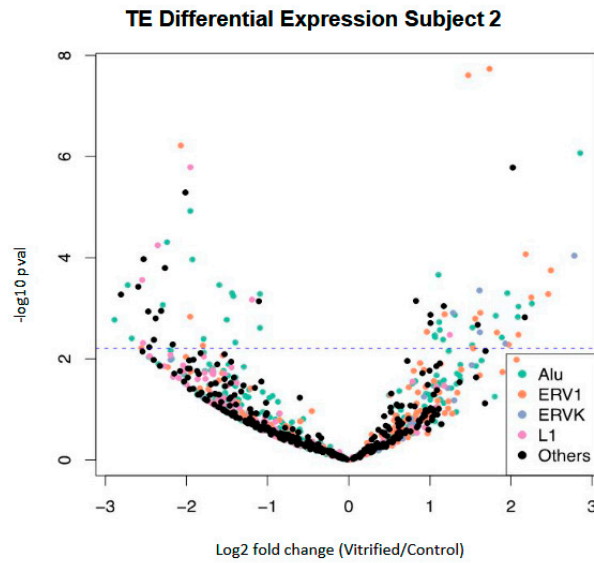

Figure S3: Volcano plot illustrating differential expression of transposable elements in samples (Vitrified vs. Non-Vitrified) from Subject 2. The line of significance is at 2.2 log<sub>10</sub> (*p* value), which corresponds to a false discovery rate (FDR) of 0.05 threshold and a *p* = 0.0062.

| Quality Control Analysis |           |             |           |             |                |         |         |                |
|--------------------------|-----------|-------------|-----------|-------------|----------------|---------|---------|----------------|
| Sample name              | Raw reads | Clean reads | Raw bases | Clean bases | Error rate (%) | Q20 (%) | Q30 (%) | GC content (%) |
| Subject 1-O1-V           | 11090020  | 11075275    | 3.3G      | 3.3G        | 0.06           | 92.28   | 77.28   | 46.26          |
| Subject 1-O2-V           | 9766770   | 9745809     | 2.9G      | 2.9G        | 0.06           | 92.21   | 77.34   | 47             |
| Subject 1-O1-NV          | 11060932  | 9969549     | 3.3G      | 3.0G        | 0.06           | 92.18   | 76.93   | 46.85          |
| Subject 1-O2-NV          | 10528675  | 10513396    | 3.2G      | 3.2G        | 0.06           | 92.24   | 77.1    | 47.38          |
| Subject 2-O1-V           | 10468781  | 10451683    | 3.1G      | 3.1G        | 0.06           | 92.31   | 77.3    | 46.61          |
| Subject 2-O2-V           | 10810563  | 10792750    | 3.2G      | 3.2G        | 0.06           | 92.43   | 77.32   | 48.15          |
| Subject 2-O3-V           | 11881430  | 11854919    | 3.6G      | 3.6G        | 0.06           | 92.24   | 77.46   | 46.72          |
| Subject 2-O4-V           | 11616917  | 11597862    | 3.5G      | 3.5G        | 0.06           | 92.39   | 77.37   | 48.31          |
| Subject 2-O1-NV          | 9851521   | 9838997     | 3.0G      | 3.0G        | 0.06           | 92.41   | 77.19   | 47.95          |
| Subject 2-O2-NV          | 9430875   | 9418226     | 2.8G      | 2.8G        | 0.06           | 92.59   | 77.6    | 48.52          |
| Subject 2-O3-NV          | 11114170  | 11101213    | 3.3G      | 3.3G        | 0.06           | 92.53   | 77.47   | 48.34          |
| Subject 2-O4-NV          | 10234518  | 10222946    | 3.1G      | 3.1G        | 0.06           | 92.38   | 77.3    | 48.26          |
| Subject 3-O1-V           | 10169006  | 10150888    | 3.1G      | 3.0G        | 0.06           | 92.38   | 77.58   | 46.71          |
| Subject 3-O2-V           | 11338221  | 11318338    | 3.4G      | 3.4G        | 0.06           | 92.23   | 77.51   | 47.37          |
| Subject 3-O3-V           | 11569711  | 11547803    | 3.5G      | 3.5G        | 0.06           | 92.42   | 77.49   | 47.37          |
| Subject 3-O2-NV          | 11481948  | 11461989    | 3.4G      | 3.4G        | 0.06           | 92.33   | 77.53   | 46.72          |
| Subject 4-O1-V           | 10402653  | 10368525    | 3.1G      | 3.1G        | 0.06           | 91.97   | 77.7    | 44.29          |
| Subject 4-O2-V           | 12635611  | 12617593    | 3.8G      | 3.8G        | 0.06           | 92.35   | 77.42   | 48.25          |
| Subject 4-O3-V           | 13022104  | 13003285    | 3.9G      | 3.9G        | 0.06           | 92.18   | 77.05   | 47.16          |
| Subject 4-O1-NV          | 15155014  | 13674340    | 4.5G      | 4.1G        | 0.06           | 92.2    | 77.15   | 48.04          |
| Subject 4-O2-NV          | 13574842  | 13553534    | 4.1G      | 4.1G        | 0.06           | 92.43   | 77.52   | 48.27          |

Supplementary Table S1: RNA sequencing data and quality control analyses for each sample. V= Vitrified cohort; NV= Non-Vitrified cohort

| Gene Mapping Analysis |             |                    |                       |                       |                    |                       |                       |
|-----------------------|-------------|--------------------|-----------------------|-----------------------|--------------------|-----------------------|-----------------------|
| Sample name           | Total reads | Total mapped reads | Uniquely mapped reads | Multiple mapped reads | Total mapping rate | Uniquely mapping rate | Multiple mapping rate |
| Subject 1-O1-V        | 22150550    | 21089652           | 20416392              | 673260                | 95.21%             | 92.17%                | 3.04%                 |
| Subject 1-O2-V        | 19491618    | 18498066           | 17880928              | 617138                | 94.90%             | 91.74%                | 3.17%                 |
| Subject 1-O1-NV       | 19939098    | 18881322           | 18231778              | 649544                | 94.69%             | 91.44%                | 3.26%                 |
| Subject 1-O2-NV       | 21026792    | 20069460           | 19415528              | 653932                | 95.45%             | 92.34%                | 3.11%                 |
| Subject 2-O1-V        | 20903366    | 19812012           | 19168894              | 643118                | 94.78%             | 91.70%                | 3.08%                 |
| Subject 2-O2-V        | 21585500    | 20645712           | 19962994              | 682718                | 95.65%             | 92.48%                | 3.16%                 |
| Subject 2-O3-V        | 23709838    | 22078044           | 21119342              | 958702                | 93.12%             | 89.07%                | 4.04%                 |
| Subject 2-O4-V        | 23195724    | 22280794           | 21549732              | 731062                | 96.06%             | 92.90%                | 3.15%                 |
| Subject 2-O1-NV       | 19677994    | 18888622           | 18262874              | 625748                | 95.99%             | 92.81%                | 3.18%                 |
| Subject 2-O2-NV       | 18836452    | 18090856           | 17472096              | 618760                | 96.04%             | 92.76%                | 3.28%                 |
| Subject 2-O3-NV       | 22202426    | 21355824           | 20628836              | 726988                | 96.19%             | 92.91%                | 3.27%                 |
| Subject 2-O4-NV       | 20445892    | 19681050           | 19027516              | 653534                | 96.26%             | 93.06%                | 3.20%                 |
| Subject 3-O1-V        | 20301776    | 19162806           | 18476234              | 686572                | 94.39%             | 91.01%                | 3.38%                 |
| Subject 3-O2-V        | 22636676    | 21421880           | 20602474              | 819406                | 94.63%             | 91.01%                | 3.62%                 |
| Subject 3-O3-V        | 23095606    | 21745250           | 20951812              | 793438                | 94.15%             | 90.72%                | 3.44%                 |
| Subject 3-O2-NV       | 22923978    | 21621590           | 20781816              | 839774                | 94.32%             | 90.66%                | 3.66%                 |
| Subject 4-O1-V        | 20737050    | 18340580           | 17651968              | 688612                | 88.44%             | 85.12%                | 3.32%                 |
| Subject 4-O2-V        | 25235186    | 24298008           | 23474336              | 823672                | 96.29%             | 93.02%                | 3.26%                 |
| Subject 4-O3-V        | 26006570    | 24966238           | 24138606              | 827632                | 96.00%             | 92.82%                | 3.18%                 |
| Subject 4-O1-NV       | 27348680    | 26264536           | 25319154              | 945382                | 96.04%             | 92.58%                | 3.46%                 |
| Subject 4-O2-NV       | 27107068    | 26025120           | 25127170              | 897950                | 96.01%             | 92.70%                | 3.31%                 |

Supplementary Table S2: Summary of reads mapped to human reference genome for each sample. V= Vitrified cohort; NV= Non-Vitrified cohort

| Gene Expression Quantification |               |             |             |             |             |
|--------------------------------|---------------|-------------|-------------|-------------|-------------|
| FPKM Interval                  | 0–1           | 1–3         | 3–15        | 15–60       | >60         |
| Subject 1-O1-V                 | 46965(79.96%) | 3885(6.61%) | 4882(8.31%) | 2095(3.57%) | 908(1.55%)  |
| Subject 1-O2-V                 | 46935(79.91%) | 3799(6.47%) | 5049(8.60%) | 2206(3.76%) | 746(1.27%)  |
| Subject 1-O1-NV                | 46977(79.98%) | 3826(6.51%) | 5022(8.55%) | 2247(3.83%) | 663(1.13%)  |
| Subject 1-O2-NV                | 47130(80.24%) | 3799(6.47%) | 4854(8.26%) | 2134(3.63%) | 818(1.39%)  |
| Subject 2-O1-V                 | 47063(80.13%) | 3739(6.37%) | 5007(8.52%) | 2207(3.76%) | 719(1.22%)  |
| Subject 2-O2-V                 | 47215(80.39%) | 3777(6.43%) | 4739(8.07%) | 2137(3.64%) | 867(1.48%)  |
| Subject 2-O3-V                 | 47067(80.13%) | 3752(6.39%) | 5035(8.57%) | 2191(3.73%) | 690(1.17%)  |
| Subject 2-O4-V                 | 46890(79.83%) | 3853(6.56%) | 5124(8.72%) | 2174(3.70%) | 694(1.18%)  |
| Subject 2-O1-NV                | 46992(80.01%) | 3779(6.43%) | 5073(8.64%) | 2142(3.65%) | 749(1.28%)  |
| Subject 2-O2-NV                | 47630(81.09%) | 3340(5.69%) | 4785(8.15%) | 2226(3.79%) | 754(1.28%)  |
| Subject 2-O3-NV                | 47269(80.48%) | 3728(6.35%) | 4619(7.86%) | 2150(3.66%) | 969(1.65%)  |
| Subject 2-O4-NV                | 48035(81.78%) | 3331(5.67%) | 4298(7.32%) | 2074(3.53%) | 997(1.70%)  |
| Subject 3-O1-V                 | 46866(79.79%) | 4005(6.82%) | 4643(7.90%) | 2110(3.59%) | 1111(1.89%) |
| Subject 3-O2-V                 | 46801(79.68%) | 4066(6.92%) | 4806(8.18%) | 2097(3.57%) | 965(1.64%)  |
| Subject 3-O3-V                 | 47141(80.26%) | 3825(6.51%) | 4678(7.96%) | 2142(3.65%) | 949(1.62%)  |
| Subject 3-O2-NV                | 47330(80.58%) | 3834(6.53%) | 4452(7.58%) | 2114(3.60%) | 1005(1.71%) |
| Subject 4-O1-V                 | 47240(80.43%) | 3897(6.63%) | 4516(7.69%) | 2064(3.51%) | 1018(1.73%) |
| Subject 4-O2-V                 | 47147(80.27%) | 3935(6.70%) | 4532(7.72%) | 2122(3.61%) | 999(1.70%)  |
| Subject 4-O3-V                 | 47123(80.23%) | 3676(6.26%) | 4913(8.36%) | 2224(3.79%) | 799(1.36%)  |
| Subject 4-O1-NV                | 47319(80.56%) | 3683(6.27%) | 4650(7.92%) | 2177(3.71%) | 906(1.54%)  |
| Subject 4-O2-NV                | 47177(80.32%) | 3756(6.39%) | 4705(8.01%) | 2156(3.67%) | 941(1.60%)  |

Supplementary Table S3: The distribution of genes at different expression levels for each sample. V= Vitrified cohort; NV= Non-Vitrified cohort
